# Supplementary material for: A Jump-from-Cavity Pyrophosphate Ion Release Assisted by a Key Lysine Residue in T7 RNA Polymerase Transcription Elongation
Source: PubMed Central journal article supplement (PMC4658072; doi:10.1371/journal.pcbi.1004624), 2015-11-24

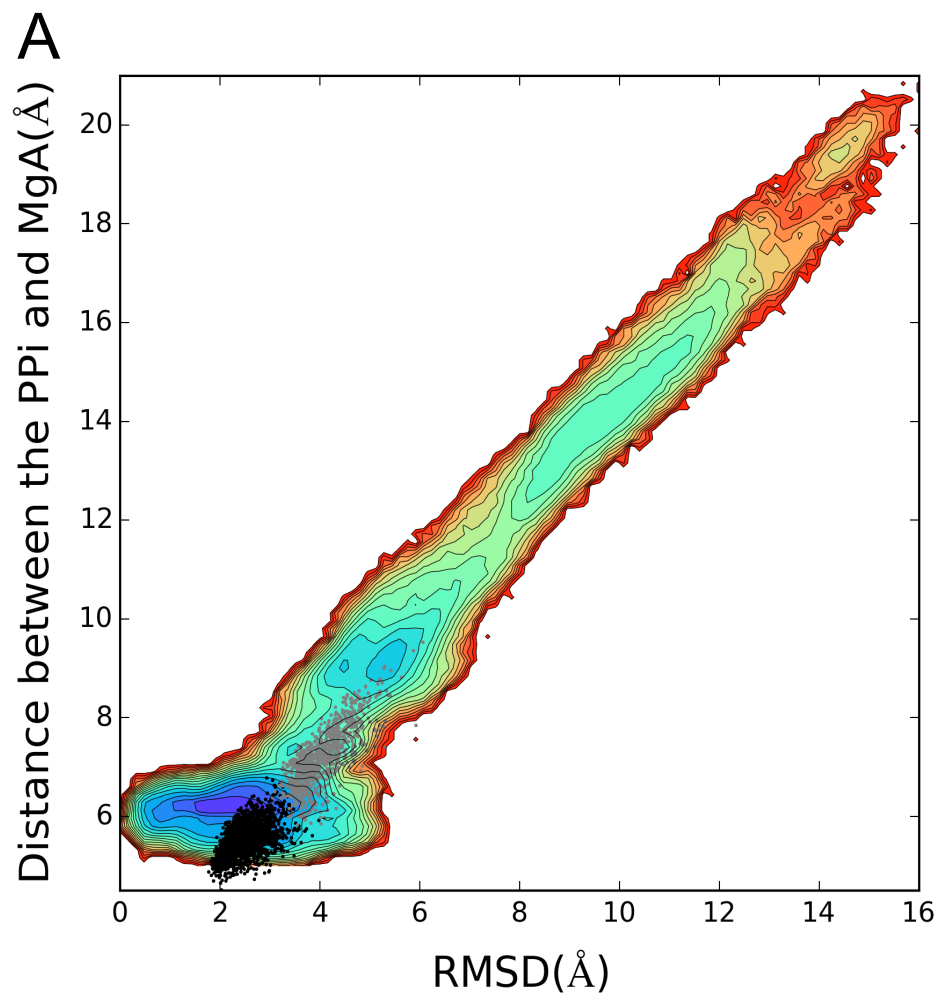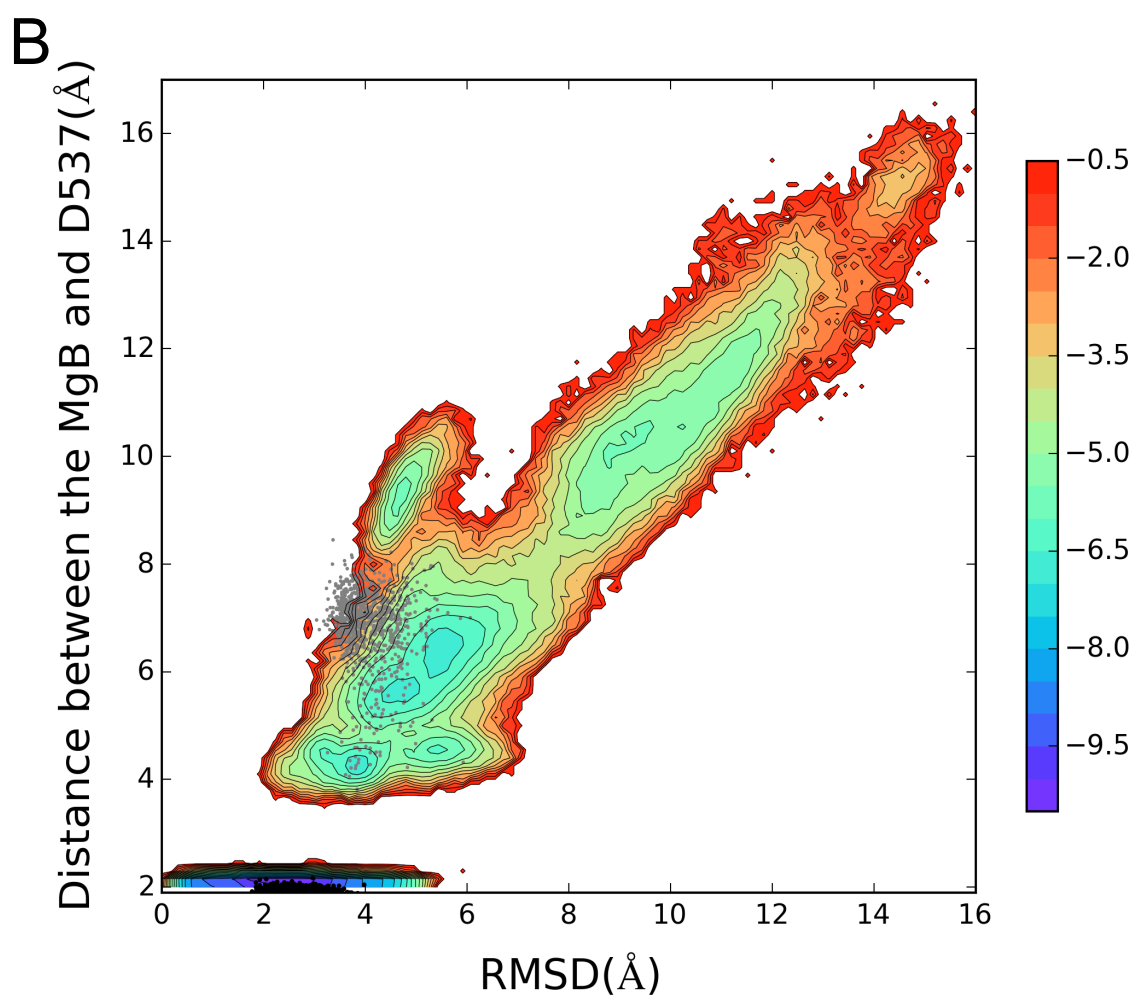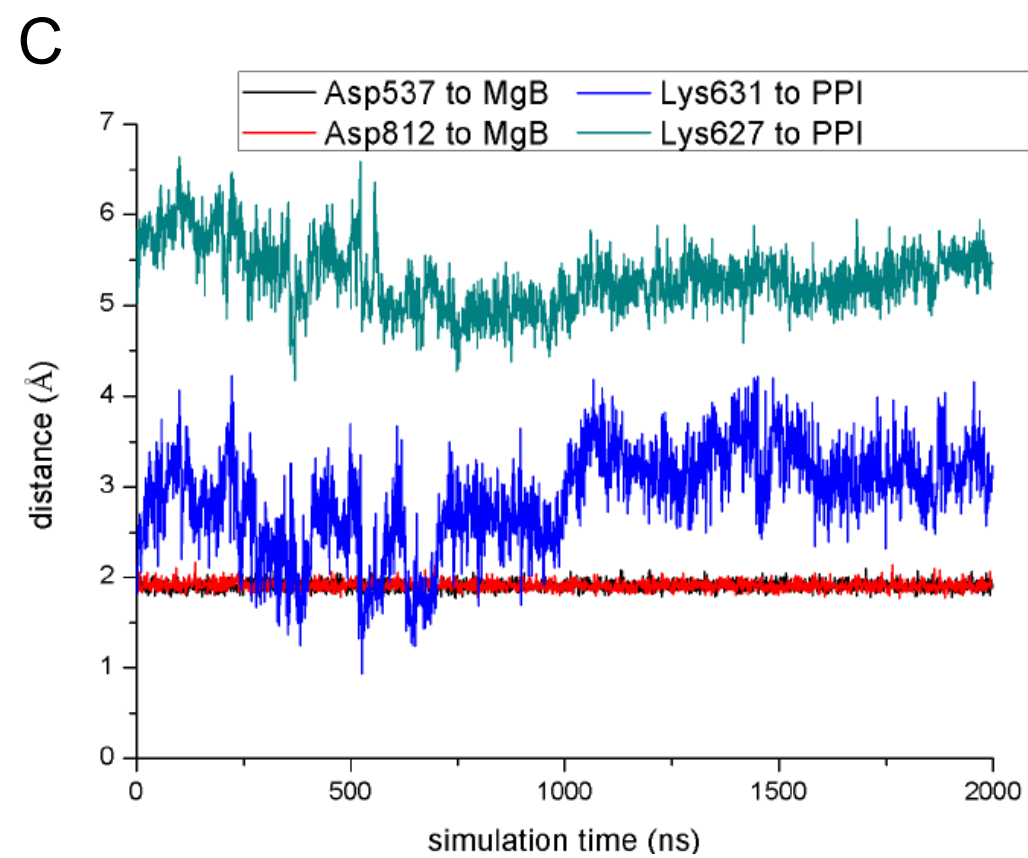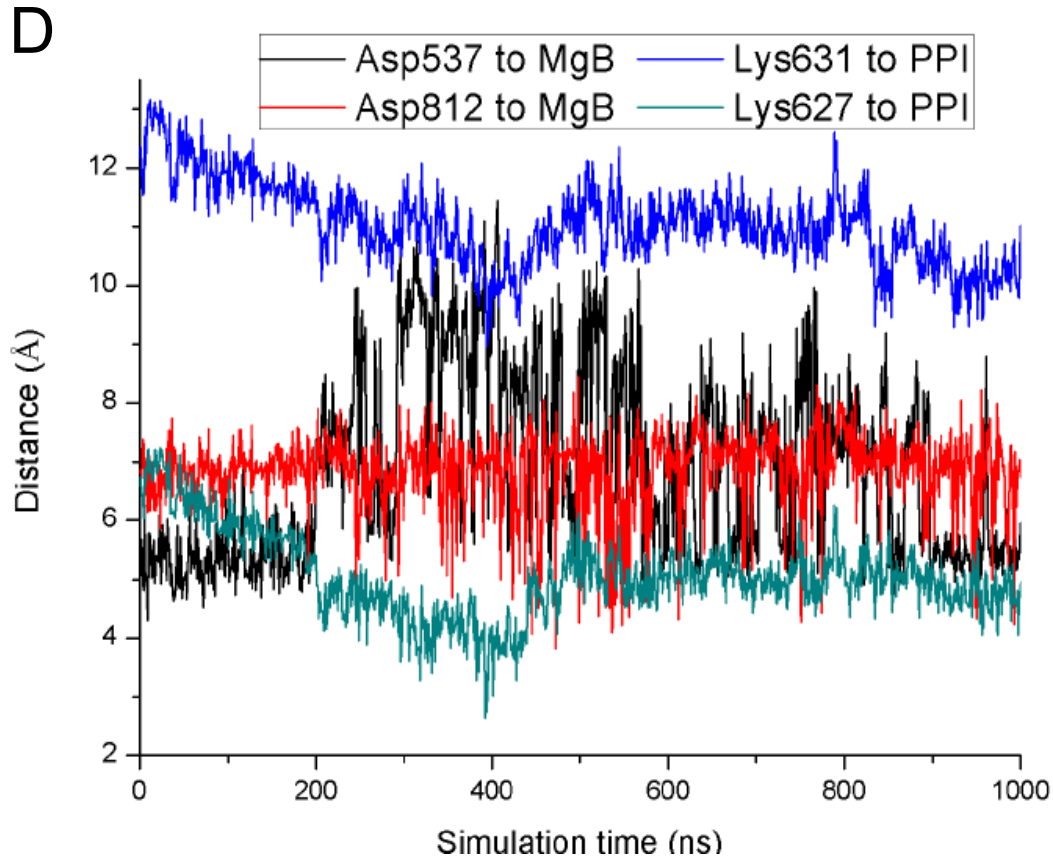

Supplement: pcbi.1004624.s002.pdf [file pcbi.1004624.s002.pdf]
